# Supplementary material
Source: publisher figshare collection journal article supplement (https://acs.figshare.com/ndownloader/files/22067307)
Supplement: Supplementary file 1 [file 22067307]

## Supporting Information

### Removal of hazardous contaminants from water by natural and zwitterionic surfactant modified clay

Hany H. Abdel Ghafar <sup>a,b</sup>, Emad K. Radwan <sup>b\*</sup>, Shaimaa T. El-Wakeel <sup>b</sup>

<sup>a</sup> University of Jeddah, college of Science and Arts at Khulais, Department of Chemistry, Jeddah, Saudi Arabia.

<sup>b</sup> Water Pollution Research Department, National Research Centre, 33 El Bohouth St, Dokki, Giza, Egypt. 12622.

#### Contents

|                                                                                                                   |   |
|-------------------------------------------------------------------------------------------------------------------|---|
| Table S1. Some properties of the zwitterionic surfactant cocamidopropyl betaine and reactive yellow 160 dye. .... | 2 |
| Table S2. The non-linear form of the studied kinetics and equilibrium isotherm models.....                        | 3 |
| Figure S1. UV-Visible spectrum of the RY160 dye. ....                                                             | 4 |
| Figure S2. Standard calibration curve of RY160.....                                                               | 5 |

---

\* Corresponding author. Tel. +202 33370931; Fax: +202 33371211. E-mail [emadk80@gmail.com](mailto:emadk80@gmail.com), [ek.hafez@nrc.sci.eg](mailto:ek.hafez@nrc.sci.eg).

Table S1. Some properties of the zwitterionic surfactant cocamidopropyl betaine and reactive yellow 160 dye.

|                   | Cocamidopropyl Betaine (CAPB)                                                      | Reactive yellow 160 dye (RY160)                                                     |
|-------------------|------------------------------------------------------------------------------------|-------------------------------------------------------------------------------------|
| <b>Formula</b>    | $C_{19}H_{38}N_2O_3$                                                               | $C_{25}H_{22}ClN_9Na_2O_{12}S_3$                                                    |
| <b>Structure</b>  | 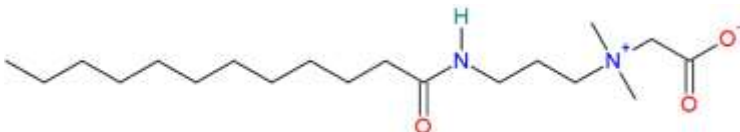 |  |
| <b>Molar mass</b> | 342.52 g/mol                                                                       | 818.12 g/mol                                                                        |

Table S2. The non-linear form of the studied kinetics and equilibrium isotherm models.

| Kinetic models       | Equation                                                                                                                        | Parameters                                                                                                                                                                                                                                                                       |
|----------------------|---------------------------------------------------------------------------------------------------------------------------------|----------------------------------------------------------------------------------------------------------------------------------------------------------------------------------------------------------------------------------------------------------------------------------|
| Pseudo-first-order   | $q_t = q_e (1 - e^{-k_1 t})$                                                                                                    | $q_t$ and $q_e$ (mg/g) are the amount of adsorbate per gram of adsorbent at time $t$ and equilibrium, respectively; $k_1$ (1/min) is the pseudo-first-order rate constants, and $t$ (min) is the contact time.                                                                   |
| Pseudo-second-order  | $q_t = \frac{k_2 q_e^2 t}{1 + k_2 q_e t}$                                                                                       | $k_2$ (g/mg.min) is the pseudo-second-order rate constants.                                                                                                                                                                                                                      |
| Isotherm models      | Equation                                                                                                                        | Parameters                                                                                                                                                                                                                                                                       |
| Langmuir             | $q_e = \frac{Q_L k_L C_e}{1 + k_L C_e}, R_L = \frac{1}{1 + k_L C_e}$                                                            | $C_e$ (mg/L) is the concentration of adsorptive at equilibrium, $Q_L$ (mg/g) is the Langmuir theoretical monolayer saturation capacity, $k_L$ (L/mg) is the equilibrium constant and $R_L$ (–) is the separation factor.                                                         |
| Freundlich           | $q_e = k_F C_e^{1/n}$                                                                                                           | $k_F$ (mg <sup>(1-1/n)</sup> L <sup>(1/n)</sup> /g) and $n$ (–) are Freundlich constants                                                                                                                                                                                         |
| Dubinin–Radushkevich | $q_e = Q_{DR} e^{\left[-\beta \left(RT \ln \left(1 + \frac{1}{C_e}\right)\right)^2\right]}$ ,<br>$E = \frac{1}{\sqrt{-2\beta}}$ | $Q_{DR}$ (mg/g) is the D–R maximum adsorption capacity, $\beta$ (mol <sup>2</sup> /J <sup>2</sup> ) is a constant related to the mean free energy of adsorption, $R$ is the universal gas constant, $T$ (K) is the absolute temperature and $E$ (kJ/mol) is the mean free energy |
| Temkin               | $q_e = \left(\frac{RT}{b_T}\right) \ln A_T C_e$                                                                                 | $b_T$ (–) is constant related to the adsorption heat, and $A_T$ is the Temkin isotherm equilibrium binding constant (L/g)                                                                                                                                                        |
| Redlich–Peterson     | $q_e = \frac{k_{RP} C_e}{1 + a_{RP} C_e^g}$                                                                                     | $k_{RP}$ (L/mg) is constant related to the adsorption capacity, $a_{RP}$ (L/mg) is constant related to the affinity of the binding sites and $g$ (g) is an exponent related to the adsorption intensity.                                                                         |

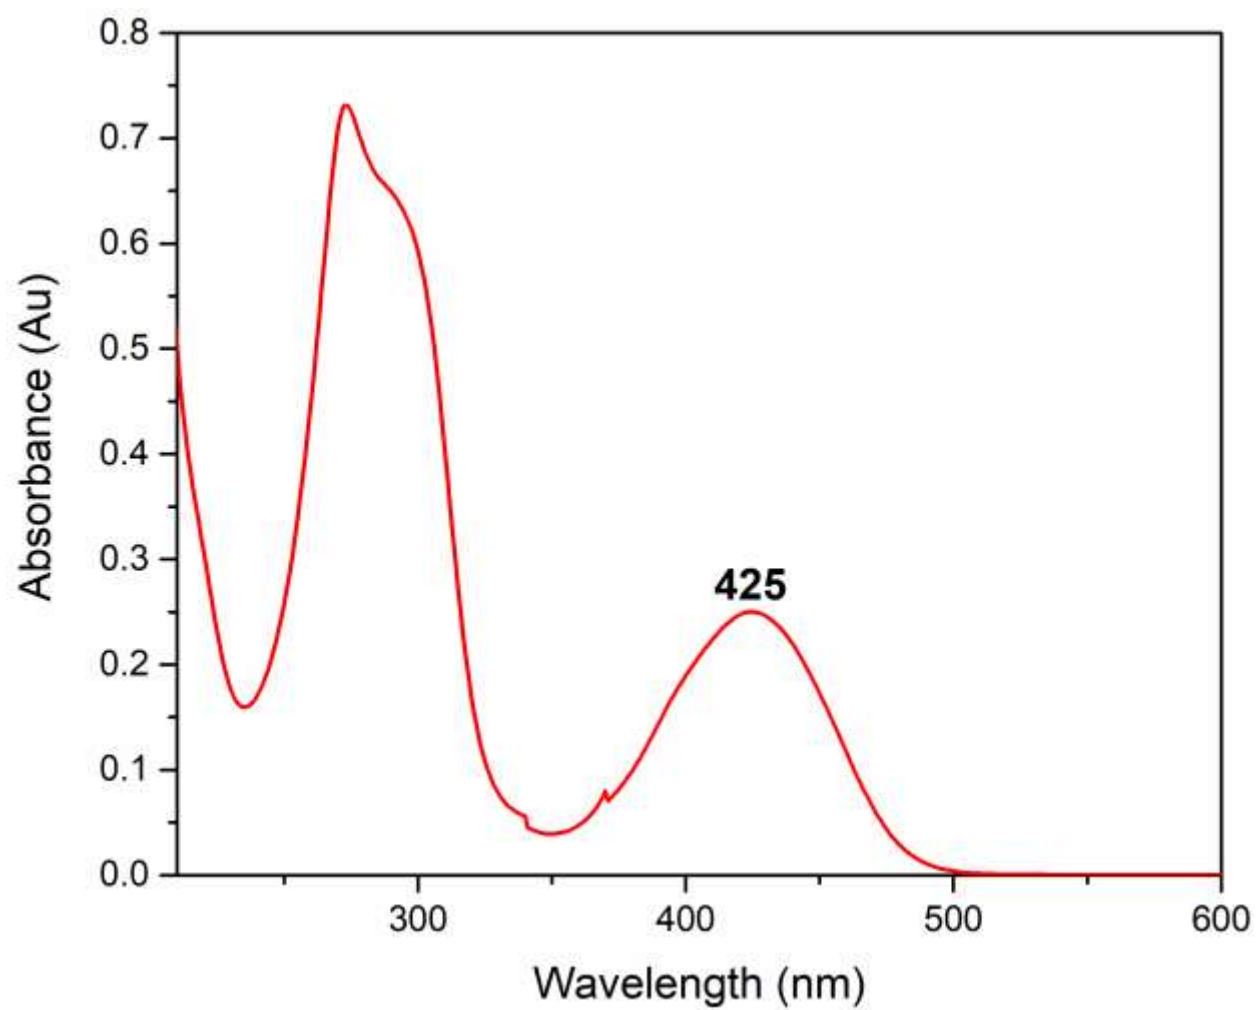

Figure S1. UV-Visible spectrum of the RY160 dye.

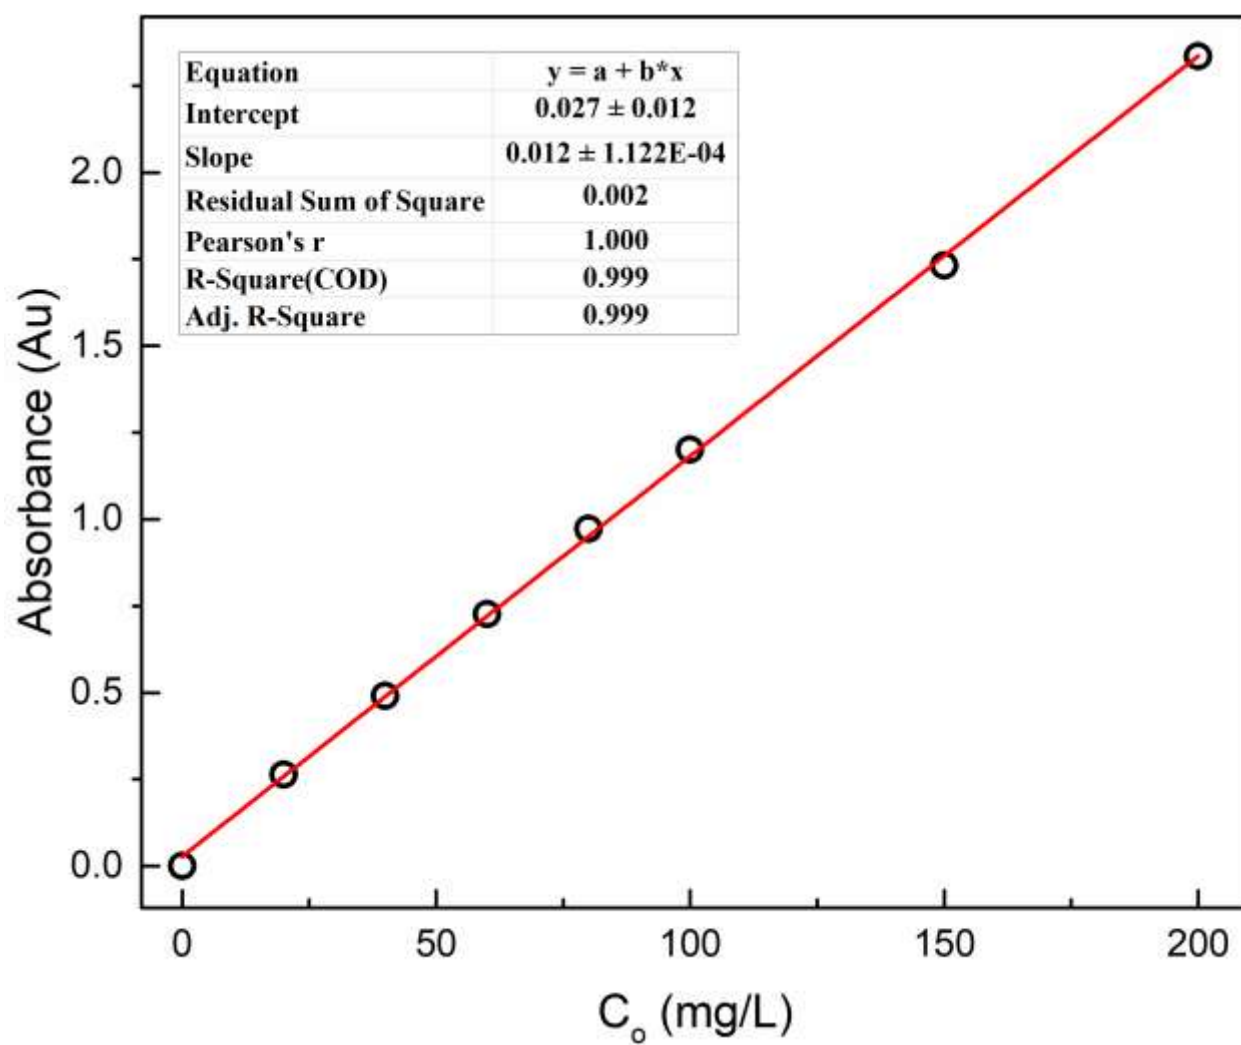

Figure S2. Standard calibration curve of RY160.
